# Supplementary material for: Vortex particle-mesh simulations of vertical axis wind turbine flows: from the airfoil performance to the very far wake
Source: Copernicus journal article supplement (doi:10.5194/wes-2-317-2017), 2017-06-19
Supplement: Supplementary file 1 [file wes-2-317-2017-supplement.zip]

Archive with 4 entries (4 files):
- wes-2-317-2017-supplement-title-page.pdf
- H_VAWT_TSR321.mov
- H_VAWT_TSR428.mov
- H_VAWT_TSR214.mov
