# Supplementary material for: Vortex particle-mesh simulations of vertical axis wind turbine flows: from the airfoil performance to the very far wake
Source: Copernicus journal article supplement (doi:10.5194/wes-2-317-2017), 2017-06-19
Supplement: Supplementary file 1 [file wes-2-317-2017-supplement.zip › wes-2-317-2017-supplement-title-page.pdf]

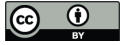

## *Supplement of*

# **Vortex particle-mesh simulations of vertical axis wind turbine flows: from the airfoil performance to the very far wake**

**Philippe Chatelain et al.**

*Correspondence to:* Philippe Chatelain ([philippe.chatelain@uclouvain.be](mailto:philippe.chatelain@uclouvain.be))

- [wes-2-317-2017-supplement-title-page.pdf](#)
- [H\\_VAWT\\_TSR214.mov](#)
- [H\\_VAWT\\_TSR321.mov](#)
- [H\\_VAWT\\_TSR428.mov](#)

The copyright of individual parts of the supplement might differ from the CC BY 3.0 License.
